# Supplementary material for: Largely enhanced photocatalytic hydrogen production rate of CdS/(Au–ReS2) nanospheres by the dielectric–plasmon hybrid antenna effect
Source: Royal Society of Chemistry journal article supplement (doi:10.1039/c8nr07013j), 2018-01-01
Supplement: c8nr07013j1.pdf [file c8nr07013j1.pdf]

## Supporting information

### **Largely Enhanced Photocatalytic Hydrogen Production for CdS/(Au-ReS<sub>2</sub>) Nanospheres by the Dielectric-Plasmon Hybrid Antenna Effect**

Jia Liu,<sup>‡a</sup> Kai Chen,<sup>‡b</sup> Gui-Ming Pan,<sup>‡a</sup> Zhi-Jun Luo,<sup>a</sup> Ying Xie,<sup>a</sup> Ying-Ying Li,<sup>a</sup> Yong-Jie Lin,<sup>b</sup> Zhong-Hua Hao,<sup>a</sup> Li Zhou,<sup>\*a</sup> Si-Jing Ding<sup>\*a</sup> and Qu-Quan Wang<sup>\*a,b</sup>

<sup>a</sup>Department of Physics, Key Laboratory of Artificial Micro- and Nano-structures of the Ministry of Education, Wuhan University, Wuhan 430072, P. R. China.

<sup>b</sup>The Institute for Advanced Studies, Wuhan University, Wuhan 430072, P. R. China.

<sup>‡</sup>These authors contributed equally to this work.

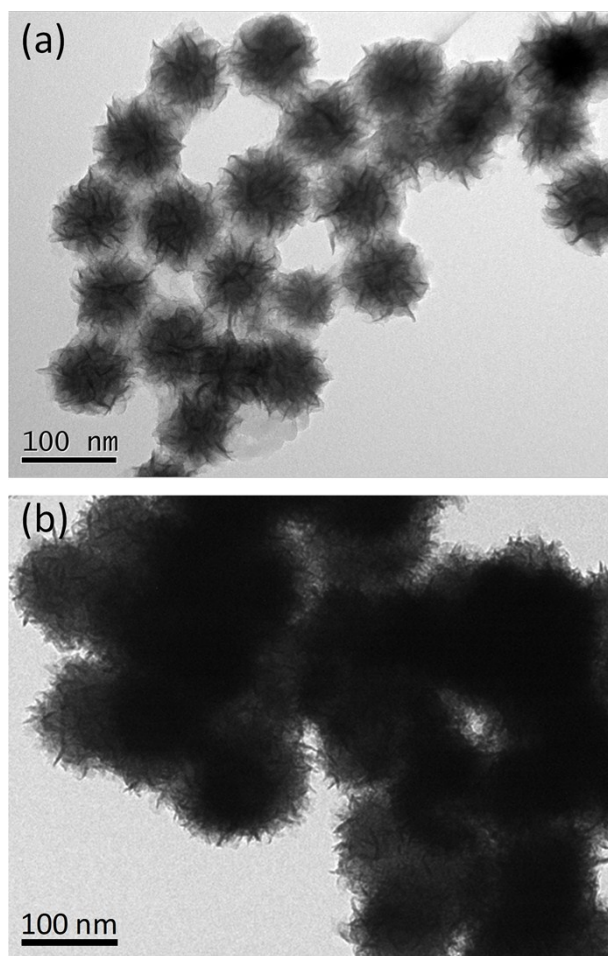

**Figure S1.** TEM images of ReS<sub>2</sub> nanospheres with an average diameter of  $114 \pm 11$  nm (a) and  $218 \pm 25$  nm (b).

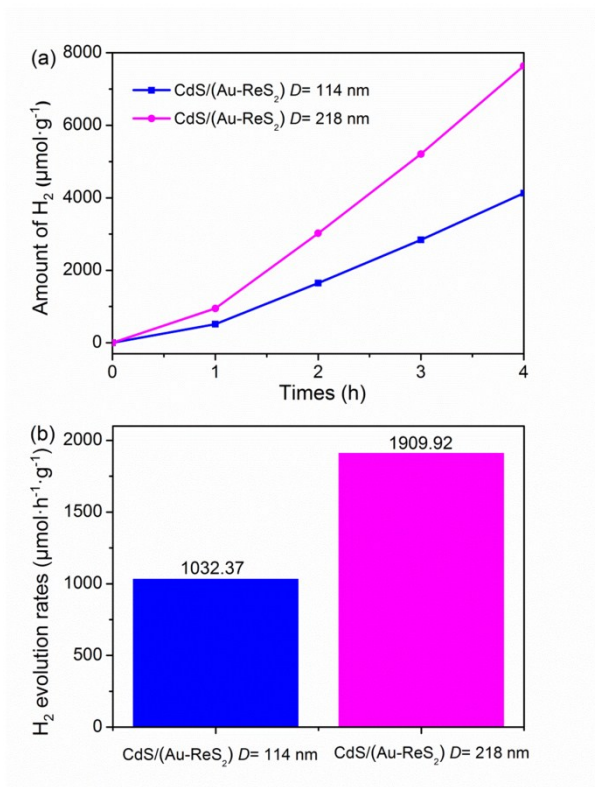

**Figure S2.** (a) Time evolution for photocatalytic generation of the H<sub>2</sub> evolution amount versus irradiation time for CdS/(Au-ReS<sub>2</sub>) complex with  $D = 114 \pm 11$  nm and  $D = 218 \pm 25$  nm. (b) Comparison of the H<sub>2</sub> evolution activities of CdS/(Au-ReS<sub>2</sub>) complex with  $D = 114 \pm 11$  nm and  $D = 218 \pm 25$  nm.
